# Supplementary material for: Metabolic Dysfunction-Associated Fatty Liver Disease Is Associated with the Risk of Incident Cardiovascular Disease: A Prospective Cohort Study in Xinjiang
Source: MDPI journal article supplement (doi:10.3390/nu14122361), 2022-06-07
Supplement: s1 [file s1]

Supplementary Table S1. Detailed calculation of non-invasive evaluation indicators of fatty liver index and hepatic steatosis index

| Definition        | Criteria                                                                                                                                                                                                                         |
|-------------------|----------------------------------------------------------------------------------------------------------------------------------------------------------------------------------------------------------------------------------|
| Hepatic steatosis | FLI $\geq 60$                                                                                                                                                                                                                    |
|                   | $FLI = \frac{e^{0.953 \times \log(TG) + 0.139 \times BMI + 0.718 \times \log(GGT) + 0.053 \times WC - 15.745}}{1 + e^{0.953 \times \log(TG) + 0.139 \times BMI + 0.718 \times \log(GGT) + 0.053 \times WC - 15.745}} \times 100$ |
|                   | HSI $> 36$                                                                                                                                                                                                                       |
|                   | HSI = $8 \times (\text{ALT/AST ratio}) + \text{BMI}$ (+2, if female; +2, if diabetes mellitus)                                                                                                                                   |

Supplementary Table S2. Baseline characteristics of non-obesity, non-dyslipidaemia, non-T2DM populations

| Variable                  | Non Obesity       |                   |        | Non Dyslipidaemia |                   |        | Non T2DM          |                   |        |
|---------------------------|-------------------|-------------------|--------|-------------------|-------------------|--------|-------------------|-------------------|--------|
|                           | MAFLD             | Non MAFLD         | $P_1$  | MAFLD             | Non MAFLD         | $P_2$  | MAFLD             | Non MAFLD         | $P_3$  |
| n                         | 703 (7.46)        | 8718 (92.54)      |        | 798 (9.85)        | 7301 (90.15)      |        | 1,498 (13.75)     | 9398 (86.25)      |        |
| Age (years)               | 42.15 $\pm$ 11.87 | 34.67 $\pm$ 13.30 | <0.001 | 42.00 $\pm$ 11.49 | 33.77 $\pm$ 13.09 | <0.001 | 42.31 $\pm$ 11.56 | 35.02 $\pm$ 13.21 | <0.001 |
| Sex                       |                   |                   | 0.001  |                   |                   | <0.001 |                   |                   | 0.967  |
| Male                      | 419 (59.60)       | 4612 (52.90)      |        | 339 (42.48)       | 3589 (49.16)      |        | 776 (51.80)       | 4863 (51.75)      |        |
| Female                    | 284 (40.40)       | 4106 (47.10)      |        | 459 (57.52)       | 3712 (50.84)      |        | 722 (48.20)       | 4535 (48.25)      |        |
| Marital status            |                   |                   | <0.001 |                   |                   | <0.001 |                   |                   | <0.001 |
| No                        | 73 (10.38)        | 1890 (21.68)      |        | 85 (10.65)        | 1664 (22.79)      |        | 139 (9.28)        | 1941 (20.65)      |        |
| Yes                       | 630 (89.62)       | 6828 (78.32)      |        | 713 (89.35)       | 5637 (77.21)      |        | 1359 (90.72)      | 7457 (79.35)      |        |
| Education                 |                   |                   | <0.001 |                   |                   | <0.001 |                   |                   | <0.001 |
| Illiteracy                | 295 (41.96)       | 3068 (35.19)      |        | 365 (45.74)       | 2518 (34.49)      |        | 668 (44.59)       | 3393 (36.10)      |        |
| Primary school            | 191 (27.17)       | 2277 (26.12)      |        | 207 (25.94)       | 1877 (25.71)      |        | 409 (27.30)       | 2478 (26.37)      |        |
| $\geq$ Junior high school | 217 (30.87)       | 3373 (38.69)      |        | 226 (28.32)       | 2906 (39.80)      |        | 421 (28.10)       | 3527 (37.53)      |        |
| Smoking                   |                   |                   | 0.02   |                   |                   | 0.066  |                   |                   | 0.848  |
| No                        | 548 (77.95)       | 7107 (81.52)      |        | 689 (86.34)       | 6121 (83.84)      |        | 1231 (82.18)      | 7742 (82.38)      |        |
| Yes                       | 155 (22.05)       | 1611 (18.48)      |        | 109 (13.66)       | 1180 (16.16)      |        | 267 (17.82)       | 1656 (17.62)      |        |
| Drinking                  |                   |                   | 0.006  |                   |                   | 0.011  |                   |                   | 0.011  |
| No                        | 650 (92.46)       | 8271 (94.87)      |        | 757 (94.86)       | 6978 (95.58)      |        | 1400 (93.46)      | 8931 (95.03)      |        |
| Yes                       | 53 (7.54)         | 447 (5.13)        |        | 41 (5.14)         | 323 (4.42)        |        | 98 (6.54)         | 467 (4.97)        |        |
| Obesity                   |                   |                   |        |                   |                   | <0.001 |                   |                   | <0.001 |
| No                        | —                 | —                 |        | 354 (44.36)       | 6672 (91.38)      |        | 631 (42.12)       | 8434 (89.74)      |        |
| Yes                       | —                 | —                 |        | 444 (55.64)       | 629 (8.62)        |        | 867 (57.88)       | 964 (10.26)       |        |
| T2DM                      |                   |                   | <0.001 |                   |                   | <0.001 |                   |                   |        |
| No                        | 631 (89.76)       | 8434 (96.74)      |        | 745 (93.36)       | 7121 (97.53)      |        | —                 | —                 |        |
| Yes                       | 72 (10.24)        | 284 (3.26)        |        | 53 (6.64)         | 180 (2.47)        |        | —                 | —                 |        |
| Dyslipidaemia             |                   |                   | <0.001 |                   |                   |        |                   |                   | <0.001 |
| No                        | 354 (50.36)       | 6672 (76.53)      |        | —                 | —                 |        | 745 (49.73)       | 7121 (75.77)      |        |
| Yes                       | 349 (49.64)       | 2046 (23.47)      |        | —                 | —                 |        | 753 (50.27)       | 2277 (24.23)      |        |
| Family history of CVD     | 102 (14.51)       | 1058 (12.14)      | 0.065  | 98 (12.28)        | 871 (11.93)       | 0.772  | 198 (13.22)       | 1154 (12.28)      | 0.306  |
| Family history of T2DM    | 46 (6.54)         | 282 (3.23)        | <0.001 | 42 (5.26)         | 243 (3.33)        | 0.005  | 85 (5.67)         | 310 (3.30)        | <0.001 |
| BMI (kg/m <sup>2</sup> )  | 27.07 $\pm$ 2.15  | 23.92 $\pm$ 3.09  | <0.001 | 30.80 $\pm$ 4.30  | 24.36 $\pm$ 4.01  | <0.001 | 31.16 $\pm$ 4.95  | 24.78 $\pm$ 4.05  | <0.001 |

|                                    |                |                |        |                |                |        |                |                |        |
|------------------------------------|----------------|----------------|--------|----------------|----------------|--------|----------------|----------------|--------|
| WC (cm)                            | 95.96 ± 10.95  | 86.37 ± 11.32  | <0.001 | 100.07 ± 11.64 | 86.56 ± 11.76  | <0.001 | 101.46 ± 12.20 | 87.72 ± 12.10  | <0.001 |
| SBP (mm Hg)                        | 131.33 ± 17.16 | 124.29 ± 16.78 | <0.001 | 133.29 ± 19.02 | 123.93 ± 16.61 | <0.001 | 133.36 ± 19.03 | 125.02 ± 17.23 | <0.001 |
| DBP (mm Hg)                        | 77.23 ± 11.46  | 72.80 ± 11.40  | <0.001 | 78.12 ± 13.43  | 72.80 ± 11.42  | <0.001 | 78.47 ± 12.71  | 73.25 ± 11.64  | <0.001 |
| FPG (mmol/L)                       | 5.38 ± 2.80    | 4.79 ± 1.46    | <0.001 | 5.00 ± 1.68    | 4.72 ± 1.32    | <0.001 | 4.85 ± 0.91    | 4.64 ± 0.83    | <0.001 |
| TG (mmol/L)                        | 2.38 ± 1.99    | 1.52 ± 1.26    | <0.001 | 1.37 ± 0.47    | 1.18 ± 0.49    | <0.001 | 2.25 ± 1.76    | 1.54 ± 1.25    | <0.001 |
| TC (mmol/L)                        | 5.23 ± 1.93    | 4.59 ± 1.98    | <0.001 | 4.68 ± 0.83    | 4.34 ± 0.89    | <0.001 | 5.22 ± 2.07    | 4.60 ± 2.04    | <0.001 |
| HDL (mmol/L)                       | 1.53 ± 0.57    | 1.59 ± 0.55    | <0.001 | 1.60 ± 0.54    | 1.62 ± 0.49    | 0.002  | 1.52 ± 0.58    | 1.58 ± 0.55    | <0.001 |
| LDL (mmol/L)                       | 2.78 ± 0.81    | 2.58 ± 0.77    | <0.001 | 2.66 ± 0.65    | 2.51 ± 0.64    | <0.001 | 2.84 ± 1.07    | 2.59 ± 0.78    | <0.001 |
| ALT (IU/L)                         | 25.86 ± 13.19  | 24.22 ± 13.50  | <0.001 | 25.14 ± 11.95  | 24.06 ± 14.04  | <0.001 | 25.93 ± 13.02  | 24.29 ± 13.84  | <0.001 |
| AST (IU/L)                         | 37.43 ± 24.49  | 28.71 ± 23.17  | <0.001 | 35.33 ± 29.81  | 27.52 ± 20.95  | <0.001 | 38.24 ± 29.10  | 28.86 ± 23.50  | <0.001 |
| GGT (IU/L)                         | 23.43 ± 16.83  | 18.07 ± 10.21  | <0.001 | 20.66 ± 13.32  | 17.55 ± 8.85   | <0.001 | 23.13 ± 16.15  | 18.22 ± 10.67  | <0.001 |
| SCr (μmol/L)                       | 74.17 ± 17.91  | 71.35 ± 15.94  | <0.001 | 70.70 ± 15.03  | 70.81 ± 14.15  | 0.817  | 72.84 ± 16.99  | 71.25 ± 15.24  | <0.001 |
| eGFR (ml/min/1.73 m <sup>2</sup> ) | 107.24 ± 40.31 | 109.95 ± 36.44 | 0.027  | 100.12 ± 34.21 | 109.84 ± 32.99 | <0.001 | 104.25 ± 38.50 | 109.33 ± 35.05 | <0.001 |
| CVD incidence                      | 101 (14.37)    | 703 (8.06)     | <0.001 | 135 (16.92)    | 580 (7.94)     | <0.001 | 265 (17.69)    | 812 (8.64)     | <0.001 |
| Follow-up, years                   | 4.32 ± 0.96    | 4.49 ± 0.70    | <0.001 | 4.32 ± 0.92    | 4.49 ± 0.70    | <0.001 | 4.28 ± 0.98    | 4.47 ± 0.72    | <0.001 |

Values are presented as means ± standard or n (%).

$P_1$ ,  $P_2$ , and  $P_3$  mean the differences in baseline parameters between the MAFLD group and the non-MAFLD group in the non-obesity, non-dyslipidaemia, and non-T2DM populations, respectively.

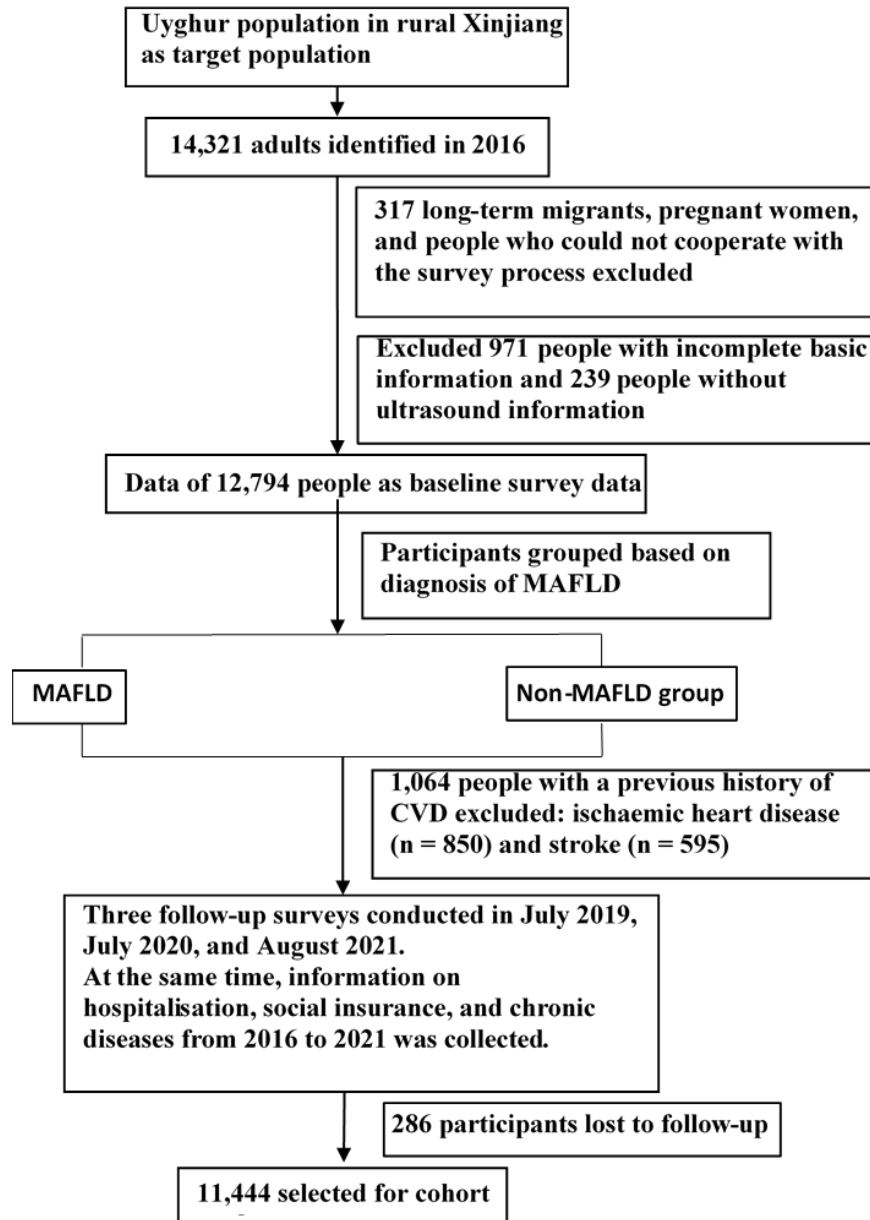

Supplementary Figure S1. Flow chart of inclusion and exclusion criteria of the study participants.

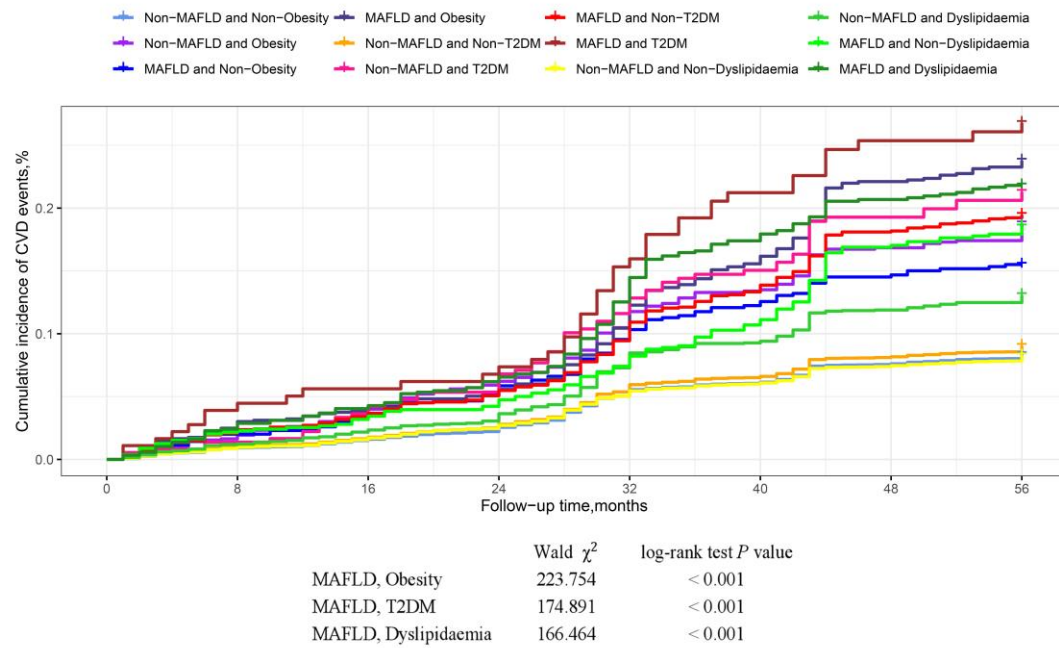

Supplementary Figure S2. Kaplan–Meier estimates for cumulative cardiovascular disease incidence based on the presence of metabolic dysfunction-associated fatty liver disease, obesity, type 2 diabetes mellitus, dyslipidaemia.
